# Supplementary material for: Construction and Evaluation of a Tumor Mutation Burden-Related Prognostic Signature for Thyroid Carcinoma
Source: Hindawi journal article supplement (doi:10.1155/2021/1435827), 2021-10-14
Supplement: f1 [file 1435827.f1.pdf]

| GeneID  | logFC    | logCPM   | PValue    | FDR       |
|---------|----------|----------|-----------|-----------|
| IGF2    | 4.432853 | 7.120853 | 5.58E-109 | 9.79E-105 |
| ATP1A3  | 3.754047 | 1.234196 | 4.42E-72  | 3.88E-68  |
| CLEC4M  | 5.100429 | -2.30878 | 8.91E-62  | 5.22E-58  |
| ALK     | 2.736026 | 3.279239 | 1.29E-54  | 5.66E-51  |
| ASAH2   | 2.258575 | 0.769492 | 3.67E-54  | 1.29E-50  |
| MATN1   | -4.63704 | 2.505861 | 1.67E-35  | 4.90E-32  |
| MYH2    | 6.391607 | 1.509254 | 4.72E-34  | 1.18E-30  |
| TERT    | 3.561382 | -2.9179  | 2.63E-33  | 5.77E-30  |
| THADA   | 1.049832 | 5.964233 | 2.07E-30  | 4.04E-27  |
| ELAVL3  | 2.614865 | -1.16713 | 3.53E-30  | 6.20E-27  |
| FCRLB   | 1.294332 | 1.213996 | 9.70E-27  | 1.55E-23  |
| CLEC4G  | 2.086696 | -1.79792 | 3.38E-26  | 4.94E-23  |
| RIMS1   | 1.631434 | -2.311   | 2.34E-25  | 3.16E-22  |
| ONECUT2 | 1.619575 | -1.11587 | 1.04E-24  | 1.30E-21  |
| AKR1B10 | -5.37794 | 2.210739 | 1.01E-23  | 1.18E-20  |
| CACNG7  | 2.801556 | -4.22466 | 3.96E-23  | 4.34E-20  |
| VWC2    | 2.497398 | -2.23236 | 8.12E-23  | 8.39E-20  |
| IGF2BP1 | 2.563667 | -1.54968 | 5.58E-22  | 5.21E-19  |
| NKAIN1  | -3.38757 | -0.50787 | 5.64E-22  | 5.21E-19  |
| PTH2R   | 1.702502 | -2.39657 | 1.79E-21  | 1.57E-18  |
| USP41   | 2.118016 | -3.05932 | 4.45E-21  | 3.72E-18  |
| MTRNR2L | 1.335591 | 0.10658  | 1.20E-20  | 9.61E-18  |
| MYH1    | 3.697338 | -2.30697 | 5.94E-20  | 4.53E-17  |
| HOXA10  | 1.810918 | -1.52273 | 1.88E-19  | 1.38E-16  |
| ATG9B   | 1.042006 | 0.59829  | 1.40E-18  | 9.84E-16  |
| DPRX    | -8.05081 | 0.707651 | 2.13E-18  | 1.44E-15  |
| IHH     | -4.48204 | -0.75083 | 2.42E-18  | 1.57E-15  |
| AKR7A3  | 1.105583 | -0.36464 | 5.38E-18  | 3.37E-15  |
| SFTPA2  | 2.520364 | 4.265723 | 1.06E-17  | 6.29E-15  |
| ATP2B2  | 1.499575 | -2.18673 | 1.07E-17  | 6.29E-15  |
| CYP4F3  | -2.7434  | -1.20531 | 2.59E-17  | 1.47E-14  |
| MNX1    | -3.7833  | -1.93227 | 7.77E-17  | 4.26E-14  |
| PRAP1   | -2.50608 | -1.51201 | 1.36E-16  | 7.24E-14  |
| PITX2   | 2.124221 | -3.30567 | 2.91E-16  | 1.50E-13  |
| HOXA9   | 1.938514 | -1.82282 | 3.16E-16  | 1.59E-13  |
| ZDHHC22 | -2.56557 | -1.8389  | 4.02E-16  | 1.96E-13  |
| LHX1    | -4.89107 | -2.14808 | 4.45E-16  | 2.11E-13  |
| CAPN8   | 1.34411  | 0.759699 | 4.66E-16  | 2.15E-13  |
| ODF3L1  | -1.48847 | -0.16323 | 6.54E-16  | 2.87E-13  |
| MYBPH   | 1.618665 | 1.515282 | 9.25E-16  | 3.96E-13  |
| TNNI2   | 1.381295 | -0.52409 | 9.78E-16  | 4.01E-13  |
| PPY     | 3.311969 | 2.051738 | 9.81E-16  | 4.01E-13  |
| SLC47A2 | -1.74234 | 1.313787 | 1.03E-15  | 4.13E-13  |
| TMEM200 | 1.24327  | -0.66146 | 1.73E-15  | 6.59E-13  |
| DPYSL5  | -3.25183 | -2.36401 | 1.73E-15  | 6.59E-13  |
| NXF3    | 1.376026 | -2.11594 | 4.66E-15  | 1.71E-12  |
| DHRS2   | -2.42061 | 2.107689 | 4.69E-15  | 1.71E-12  |
| TNFSF4  | 1.004522 | 1.66587  | 1.34E-14  | 4.82E-12  |
| AKR1C2  | -2.24817 | 2.788641 | 1.62E-14  | 5.68E-12  |
| AKR1C1  | -1.72243 | 2.791105 | 2.88E-14  | 9.92E-12  |
| TLX1    | -2.67122 | -2.37649 | 3.08E-14  | 1.04E-11  |
| TNNT3   | 1.54409  | -0.36528 | 3.89E-14  | 1.29E-11  |
| IL36G   | 2.068516 | -3.50232 | 6.73E-14  | 2.19E-11  |
| FUT9    | 2.075934 | 0.019564 | 6.93E-14  | 2.21E-11  |
| PNLIP   | -6.04436 | -2.78604 | 7.41E-14  | 2.32E-11  |
| SLC5A5  | -2.69457 | 3.391684 | 9.59E-14  | 2.95E-11  |
| AQP8    | 1.427527 | -1.83287 | 1.22E-13  | 3.69E-11  |

|         |          |          |          |          |
|---------|----------|----------|----------|----------|
| CPA1    | -3.07688 | -2.56846 | 1.79E-13 | 5.23E-11 |
| AGRP    | 1.213955 | -2.81382 | 1.97E-13 | 5.67E-11 |
| CDHR5   | 1.202081 | -2.27121 | 2.29E-13 | 6.48E-11 |
| SEMG1   | -5.60323 | -2.27527 | 3.51E-13 | 9.79E-11 |
| NOTUM   | -2.47856 | -0.22586 | 4.08E-13 | 1.12E-10 |
| VSIG1   | 1.06504  | 0.319177 | 4.20E-13 | 1.13E-10 |
| NR4A3   | -1.53154 | 4.020959 | 5.67E-13 | 1.48E-10 |
| EMX1    | 1.713288 | -3.16587 | 6.40E-13 | 1.62E-10 |
| SOX14   | -5.5966  | -2.35674 | 6.42E-13 | 1.62E-10 |
| CALN1   | 1.922551 | -0.55108 | 6.45E-13 | 1.62E-10 |
| RBM24   | 1.13724  | -0.4036  | 6.83E-13 | 1.69E-10 |
| ADAM12  | 1.266522 | 3.203644 | 7.22E-13 | 1.76E-10 |
| AMER2   | -2.75897 | -1.61155 | 7.47E-13 | 1.80E-10 |
| HOXA11  | 1.812535 | -1.56918 | 1.09E-12 | 2.55E-10 |
| CDKN2A  | 1.053073 | 2.426901 | 1.10E-12 | 2.55E-10 |
| PTGDS   | -1.62674 | 4.846639 | 1.19E-12 | 2.71E-10 |
| TRIM67  | 1.143271 | -2.41801 | 1.32E-12 | 2.97E-10 |
| LOXL4   | -1.07751 | 4.589226 | 1.34E-12 | 2.99E-10 |
| PTPRN   | 1.41114  | -1.39189 | 1.37E-12 | 3.01E-10 |
| ACTN2   | 1.766648 | 0.157503 | 2.76E-12 | 5.69E-10 |
| SYT1    | 1.376682 | 3.22112  | 4.16E-12 | 8.40E-10 |
| FGF21   | 2.669681 | -3.93556 | 4.84E-12 | 9.64E-10 |
| SEMG2   | -5.5249  | -2.99369 | 4.89E-12 | 9.64E-10 |
| RNF17   | -2.3954  | -2.11132 | 4.96E-12 | 9.68E-10 |
| SLC13A2 | 2.022884 | -3.87062 | 5.73E-12 | 1.09E-09 |
| FOXB1   | 1.881515 | -3.60666 | 5.92E-12 | 1.12E-09 |
| DKK1    | 1.270565 | 0.010135 | 6.79E-12 | 1.27E-09 |
| CADPS   | -2.07202 | 0.37913  | 7.36E-12 | 1.36E-09 |
| HBEGF   | -1.04585 | 5.850857 | 8.38E-12 | 1.52E-09 |
| CACNA1E | 1.744856 | 0.751143 | 9.63E-12 | 1.71E-09 |
| MLN     | -3.11743 | -2.69457 | 9.80E-12 | 1.72E-09 |
| EGR2    | -1.03854 | 6.127676 | 1.24E-11 | 2.13E-09 |
| KRT23   | -2.23305 | -1.96478 | 1.40E-11 | 2.39E-09 |
| WT1     | 1.508905 | -2.2719  | 1.47E-11 | 2.48E-09 |
| SLC13A5 | -1.46174 | -0.99909 | 1.85E-11 | 3.10E-09 |
| PODNL1  | 1.17893  | 1.718045 | 2.47E-11 | 4.09E-09 |
| PRKCG   | -1.90998 | -2.60677 | 2.56E-11 | 4.19E-09 |
| LMOD3   | 1.028743 | -1.90423 | 2.73E-11 | 4.44E-09 |
| SBSPON  | -1.05906 | 1.348102 | 2.93E-11 | 4.72E-09 |
| KIRREL3 | 1.725341 | -0.07572 | 3.30E-11 | 5.27E-09 |
| POSTN   | 1.158809 | 6.850984 | 3.69E-11 | 5.83E-09 |
| SFTPA1  | 2.201958 | 6.180446 | 4.25E-11 | 6.55E-09 |
| COL1A2  | 1.015064 | 9.459524 | 4.36E-11 | 6.65E-09 |
| PPBP    | 1.411411 | -0.34663 | 5.07E-11 | 7.68E-09 |
| ACTA1   | 1.73666  | 1.589497 | 5.51E-11 | 8.20E-09 |
| DRC1    | -1.22072 | -2.0295  | 6.20E-11 | 9.07E-09 |
| UTS2R   | -1.38296 | 0.537037 | 6.52E-11 | 9.47E-09 |
| ATF3    | -1.22046 | 7.154084 | 7.69E-11 | 1.10E-08 |
| MYBPHL  | 1.03085  | -0.42493 | 8.66E-11 | 1.22E-08 |
| DKK4    | -2.3014  | -3.5772  | 9.18E-11 | 1.28E-08 |
| NEFH    | -1.20139 | 0.840228 | 9.40E-11 | 1.29E-08 |
| SCUBE1  | -1.32839 | 3.24135  | 9.80E-11 | 1.33E-08 |
| NROB1   | -3.80064 | -2.01217 | 9.82E-11 | 1.33E-08 |
| TMEM132 | -2.15042 | -0.36671 | 1.21E-10 | 1.62E-08 |
| AZU1    | 1.268487 | -1.0044  | 1.28E-10 | 1.69E-08 |
| AGR3    | -1.48502 | -0.75807 | 1.46E-10 | 1.88E-08 |
| COL9A3  | -2.17626 | 6.866388 | 1.63E-10 | 2.08E-08 |
| TDRD1   | 1.143135 | -3.06275 | 2.64E-10 | 3.34E-08 |

|          |          |          |          |          |
|----------|----------|----------|----------|----------|
| FAT3     | 1.102313 | -2.08369 | 2.72E-10 | 3.41E-08 |
| EPHA5    | -1.82029 | -0.00214 | 2.79E-10 | 3.47E-08 |
| KRT85    | -2.2794  | -1.47119 | 2.97E-10 | 3.66E-08 |
| ARSF     | 2.193661 | -0.0625  | 2.98E-10 | 3.66E-08 |
| GUCA1A   | 1.47873  | -4.0714  | 3.14E-10 | 3.80E-08 |
| KCNJ6    | 1.302079 | -2.13998 | 3.24E-10 | 3.89E-08 |
| CCN4     | 1.136583 | 1.165763 | 3.51E-10 | 4.16E-08 |
| POMC     | -1.04322 | 0.534223 | 3.93E-10 | 4.63E-08 |
| CTHRC1   | 1.074308 | 3.959736 | 4.14E-10 | 4.84E-08 |
| COL3A1   | 1.028351 | 9.283793 | 4.17E-10 | 4.85E-08 |
| MCEMP1   | 1.349182 | 1.285154 | 4.73E-10 | 5.39E-08 |
| SMCO3    | -1.1167  | -0.75584 | 6.32E-10 | 7.07E-08 |
| GLRA1    | -2.25141 | -2.96996 | 6.59E-10 | 7.28E-08 |
| GPX2     | -1.13588 | -1.44182 | 9.22E-10 | 9.95E-08 |
| HSD17B2  | 1.507108 | -3.53567 | 9.23E-10 | 9.95E-08 |
| MT3      | 1.29113  | 0.002911 | 9.71E-10 | 1.04E-07 |
| COL11A1  | 1.675886 | 3.906935 | 1.01E-09 | 1.07E-07 |
| ATP2B3   | 2.483417 | -0.55648 | 1.10E-09 | 1.15E-07 |
| COL1A1   | 1.103214 | 10.02343 | 1.18E-09 | 1.22E-07 |
| CPB1     | -2.47629 | -3.25602 | 1.22E-09 | 1.25E-07 |
| WIF1     | -3.44233 | 1.868944 | 1.25E-09 | 1.28E-07 |
| CRCT1    | 1.806189 | -4.2614  | 1.29E-09 | 1.31E-07 |
| FREM3    | 1.304557 | -1.54781 | 1.35E-09 | 1.36E-07 |
| DPYS     | -1.50097 | -2.26082 | 1.56E-09 | 1.56E-07 |
| HMGCS2   | -2.53755 | -0.16047 | 1.68E-09 | 1.66E-07 |
| GAPDHS   | -2.06432 | -3.53128 | 1.73E-09 | 1.69E-07 |
| STAB2    | 1.152542 | -0.81074 | 1.74E-09 | 1.69E-07 |
| FOSB     | -1.2679  | 8.235626 | 2.23E-09 | 2.16E-07 |
| MYL1     | 3.243552 | -0.47217 | 2.38E-09 | 2.28E-07 |
| SLC35F1  | -1.07222 | 1.259841 | 2.45E-09 | 2.34E-07 |
| SLC24A2  | 1.568368 | -1.11926 | 2.86E-09 | 2.67E-07 |
| CELA3B   | -3.33125 | -3.64991 | 3.29E-09 | 3.05E-07 |
| CELA3A   | -3.66933 | -3.54712 | 3.31E-09 | 3.06E-07 |
| CYP26A1  | 1.170495 | -1.11009 | 3.50E-09 | 3.21E-07 |
| PRAMEF1  | 1.755269 | -3.69746 | 3.55E-09 | 3.22E-07 |
| SLC35D3  | 1.348503 | -3.12123 | 3.56E-09 | 3.22E-07 |
| SERPINB1 | 1.513894 | -4.07521 | 3.57E-09 | 3.22E-07 |
| IGFL3    | 1.649439 | -3.77967 | 3.66E-09 | 3.28E-07 |
| IL37     | 1.772554 | -1.99351 | 4.15E-09 | 3.66E-07 |
| EPPIN    | -1.7327  | -2.32343 | 6.06E-09 | 5.17E-07 |
| AKR1C3   | -1.0239  | 3.203833 | 7.00E-09 | 5.71E-07 |
| NR0B2    | 1.347463 | -1.38793 | 7.17E-09 | 5.83E-07 |
| LHFPL4   | 1.179668 | -1.07231 | 7.30E-09 | 5.91E-07 |
| CCDC198  | -2.20259 | -3.44514 | 7.75E-09 | 6.21E-07 |
| RETN     | 1.317759 | -0.26797 | 7.91E-09 | 6.29E-07 |
| CTRB2    | -1.56175 | -3.21406 | 8.02E-09 | 6.34E-07 |
| IVL      | 1.431597 | 2.818414 | 9.89E-09 | 7.76E-07 |
| TAGLN3   | -1.48461 | 0.860495 | 1.01E-08 | 7.86E-07 |
| PSG6     | 1.629045 | -3.09172 | 1.01E-08 | 7.86E-07 |
| PSG1     | 1.330233 | 1.585243 | 1.05E-08 | 8.09E-07 |
| LRRC15   | 1.457607 | 3.206677 | 1.16E-08 | 8.89E-07 |
| CHRND    | 1.507837 | -3.56431 | 1.30E-08 | 9.91E-07 |
| USH1C    | -1.38686 | -0.49046 | 1.36E-08 | 1.03E-06 |
| TGM4     | -1.41593 | -2.15004 | 1.36E-08 | 1.03E-06 |
| CNTNAP2  | -1.43145 | 1.506217 | 1.84E-08 | 1.34E-06 |
| LCN1     | 1.151471 | -4.30144 | 1.97E-08 | 1.43E-06 |
| IL12RB2  | -1.10394 | -0.9063  | 2.15E-08 | 1.54E-06 |
| ALDH1L1  | 1.114461 | 2.532548 | 2.24E-08 | 1.59E-06 |

|          |          |          |          |          |
|----------|----------|----------|----------|----------|
| VAX1     | -3.30128 | -3.36455 | 2.47E-08 | 1.74E-06 |
| HOXB8    | 1.224465 | -3.24556 | 2.62E-08 | 1.83E-06 |
| CXCL5    | 1.236703 | 0.135281 | 3.33E-08 | 2.22E-06 |
| CASR     | -2.48929 | -2.17039 | 3.60E-08 | 2.34E-06 |
| CBLN2    | 1.278798 | -3.62489 | 3.87E-08 | 2.50E-06 |
| GPR142   | -1.45242 | -3.04139 | 4.70E-08 | 2.96E-06 |
| TNP1     | -1.44715 | -4.06114 | 5.27E-08 | 3.27E-06 |
| CTRB1    | -1.52681 | -3.70715 | 5.53E-08 | 3.39E-06 |
| ATP1B4   | 1.413653 | -3.82912 | 6.38E-08 | 3.82E-06 |
| PRRT4    | -1.57609 | 1.813975 | 8.21E-08 | 4.76E-06 |
| HYAL4    | -1.7031  | -3.44036 | 8.81E-08 | 5.04E-06 |
| WFDC6    | -1.96449 | -3.75653 | 8.84E-08 | 5.04E-06 |
| PLPPR5   | 1.573889 | -3.88686 | 9.44E-08 | 5.31E-06 |
| FER1L6   | -1.64581 | 0.357169 | 1.01E-07 | 5.66E-06 |
| CABP7    | -1.1173  | -0.22645 | 1.03E-07 | 5.76E-06 |
| INSL6    | -1.90513 | -3.75506 | 1.04E-07 | 5.76E-06 |
| IGF1     | -1.02111 | 1.188494 | 1.12E-07 | 6.22E-06 |
| THEG     | 1.380432 | -2.37451 | 1.14E-07 | 6.28E-06 |
| NYAP2    | -1.6916  | -0.56612 | 1.18E-07 | 6.48E-06 |
| MYPN     | 1.628061 | -3.13441 | 1.21E-07 | 6.56E-06 |
| PLA2G2A  | 1.340038 | 2.756106 | 1.61E-07 | 8.48E-06 |
| ATP6V0A4 | -1.45388 | -2.04972 | 1.69E-07 | 8.87E-06 |
| EIF4E1B  | 1.66809  | -3.55742 | 1.80E-07 | 9.33E-06 |
| GMNC     | -1.73045 | -2.14821 | 1.87E-07 | 9.63E-06 |
| MYBPC1   | 1.368607 | 0.753362 | 2.03E-07 | 1.03E-05 |
| NRAP     | 2.048101 | 0.081126 | 2.11E-07 | 1.07E-05 |
| SOX11    | 1.023772 | 0.935903 | 2.55E-07 | 1.26E-05 |
| HS3ST4   | -1.34415 | -2.20616 | 2.65E-07 | 1.30E-05 |
| OTOG     | -1.59719 | -4.22069 | 3.58E-07 | 1.72E-05 |
| TFF3     | -1.41448 | 6.560517 | 3.78E-07 | 1.81E-05 |
| IGFN1    | 1.262344 | 6.655411 | 3.88E-07 | 1.85E-05 |
| SLC6A2   | -1.7707  | -3.07277 | 4.14E-07 | 1.95E-05 |
| BMP8A    | -1.28817 | 2.892017 | 4.16E-07 | 1.96E-05 |
| SLN      | 1.778909 | -1.17663 | 4.32E-07 | 2.01E-05 |
| EPYC     | 1.714039 | -0.00121 | 4.49E-07 | 2.08E-05 |
| F5       | 1.124429 | 4.283755 | 4.92E-07 | 2.25E-05 |
| SCRT2    | 2.115075 | -3.13586 | 5.26E-07 | 2.37E-05 |
| NUGGC    | -1.00751 | 1.214391 | 5.63E-07 | 2.52E-05 |
| ZIC4     | 1.438596 | -4.29365 | 5.67E-07 | 2.53E-05 |
| MPPED1   | -2.64809 | -2.177   | 5.69E-07 | 2.53E-05 |
| OLFM4    | 1.170647 | -0.8489  | 5.76E-07 | 2.55E-05 |
| UGT3A1   | -2.56161 | -3.24391 | 5.85E-07 | 2.57E-05 |
| KRT75    | -2.1453  | -2.59324 | 6.61E-07 | 2.86E-05 |
| MUC21    | 1.147703 | 4.373301 | 6.94E-07 | 2.98E-05 |
| CACNA1S  | 1.434106 | -2.73144 | 7.24E-07 | 3.06E-05 |
| INSM2    | 1.01879  | -4.08076 | 7.35E-07 | 3.08E-05 |
| OR8G5    | 1.390924 | -4.29834 | 7.37E-07 | 3.08E-05 |
| CELA2A   | -1.37151 | -3.72885 | 8.26E-07 | 3.40E-05 |
| PVALB    | 1.459885 | 1.855102 | 8.63E-07 | 3.53E-05 |
| CLCA2    | -1.62333 | 1.144207 | 8.67E-07 | 3.54E-05 |
| HECW1    | -1.12134 | -0.28364 | 9.00E-07 | 3.61E-05 |
| COL10A1  | 1.084933 | 3.573767 | 9.40E-07 | 3.73E-05 |
| NDST4    | -2.04851 | -3.9342  | 9.99E-07 | 3.91E-05 |
| MMP13    | 1.699828 | 1.500363 | 1.00E-06 | 3.92E-05 |
| C6orf118 | -1.01059 | -3.32771 | 1.03E-06 | 4.00E-05 |
| CPLX2    | -1.65943 | -1.00924 | 1.09E-06 | 4.21E-05 |
| TRH      | -1.0897  | -3.22489 | 1.24E-06 | 4.66E-05 |
| ELANE    | 1.151585 | -1.60612 | 1.25E-06 | 4.69E-05 |

|          |          |          |          |             |
|----------|----------|----------|----------|-------------|
| MFAP5    | 1.025516 | 2.572742 | 1.28E-06 | 4.81E-05    |
| REG1A    | -3.16317 | -1.58886 | 1.53E-06 | 5.63E-05    |
| DPPA5    | -1.77345 | -4.11463 | 1.72E-06 | 6.19E-05    |
| PPP1R3A  | 2.427913 | -4.224   | 1.77E-06 | 6.35E-05    |
| NPY      | -2.10438 | 2.286182 | 1.77E-06 | 6.36E-05    |
| SPATA19  | -1.37083 | -3.58005 | 1.80E-06 | 6.45E-05    |
| CRH      | 1.077602 | -3.3345  | 1.82E-06 | 6.49E-05    |
| SPRR1B   | 1.479587 | -0.4968  | 1.83E-06 | 6.49E-05    |
| SLC5A7   | -1.76577 | -0.53316 | 1.84E-06 | 6.54E-05    |
| TFF2     | -1.75417 | -2.08087 | 2.05E-06 | 7.14E-05    |
| C10orf71 | 2.101628 | -3.15798 | 2.07E-06 | 7.21E-05    |
| SERPINB7 | 1.110466 | -3.0688  | 2.14E-06 | 7.40E-05    |
| TTC29    | -1.00013 | -3.17414 | 2.25E-06 | 7.68E-05    |
| SMPX     | 1.512387 | -2.98343 | 2.36E-06 | 8.03E-05    |
| PTPRT    | -1.30391 | -0.29063 | 2.59E-06 | 8.69E-05    |
| LGR5     | 1.173411 | -0.58955 | 2.64E-06 | 8.82E-05    |
| ZIC1     | 1.341877 | -3.62615 | 2.89E-06 | 9.44E-05    |
| ADIPOQ   | 1.817601 | -1.70031 | 3.04E-06 | 9.78E-05    |
| IL36A    | 1.166569 | -3.95372 | 3.39E-06 | 0.000106174 |
| METTL11E | 1.528161 | -4.15015 | 3.45E-06 | 0.00010765  |
| AADAC    | -1.4458  | -3.87148 | 3.55E-06 | 0.000110204 |
| HOXA6    | 1.056082 | -4.39381 | 3.63E-06 | 0.000112054 |
| CIDEC    | 1.214841 | -2.81086 | 3.68E-06 | 0.000113264 |
| LIPK     | 1.426895 | -3.94407 | 4.02E-06 | 0.000122693 |
| CLPS     | -2.44583 | -4.34475 | 4.35E-06 | 0.000131695 |
| CSMD3    | -1.17014 | -3.04752 | 4.39E-06 | 0.00013255  |
| MUCL1    | -2.08674 | -3.75548 | 4.59E-06 | 0.000136932 |
| KCNJ13   | -1.0162  | 1.056819 | 5.04E-06 | 0.00014807  |
| ZNF280A  | -1.52363 | -4.0761  | 5.43E-06 | 0.000157274 |
| ADARB2   | 1.194959 | -0.53542 | 5.51E-06 | 0.000158893 |
| NOX5     | -1.01895 | 2.429598 | 5.53E-06 | 0.000159171 |
| KLK1     | 1.31079  | 3.54145  | 5.86E-06 | 0.000167424 |
| SCN1A    | 1.07816  | -2.97332 | 6.07E-06 | 0.000171647 |
| TRARG1   | 1.039268 | -2.83236 | 6.40E-06 | 0.000178666 |
| PLA2G2D  | -1.17052 | 1.13358  | 6.49E-06 | 0.000180999 |
| SERPINB1 | 2.346312 | 0.064087 | 8.93E-06 | 0.000234661 |
| PGLYRP4  | 1.238806 | -3.99976 | 8.96E-06 | 0.000235249 |
| CIDEA    | 1.129563 | -3.73133 | 9.12E-06 | 0.00023853  |
| BIRC7    | 1.00587  | 3.116145 | 9.60E-06 | 0.000247062 |
| ABCC12   | -1.60317 | -1.52611 | 9.74E-06 | 0.000250141 |
| MYF6     | 1.756603 | -3.50877 | 1.05E-05 | 0.00026452  |
| TYR      | -1.48214 | -4.01216 | 1.11E-05 | 0.000277892 |
| ARMC3    | -1.24817 | -2.51855 | 1.26E-05 | 0.000307508 |
| KERA     | 1.296368 | -3.14672 | 1.28E-05 | 0.000311449 |
| KRT5     | -1.53988 | 3.257212 | 1.30E-05 | 0.000313298 |
| CSRP3    | 2.078827 | -1.89095 | 1.38E-05 | 0.000330064 |
| CT83     | 2.173071 | -4.22254 | 1.38E-05 | 0.000330486 |
| ANGPTL7  | -1.10883 | -2.88939 | 1.46E-05 | 0.000345184 |
| TMPRSS11 | 1.103464 | 1.791694 | 1.47E-05 | 0.000345419 |
| HOXD10   | 1.103116 | -1.56324 | 1.50E-05 | 0.000350972 |
| MUC5AC   | -1.16268 | -3.82944 | 1.53E-05 | 0.000356566 |
| SPATA22  | -1.28154 | -3.49605 | 1.54E-05 | 0.000357259 |
| GDF10    | -1.09119 | 1.229175 | 1.77E-05 | 0.000398467 |
| CD5L     | 1.201619 | -1.59713 | 1.84E-05 | 0.000411309 |
| KCNC2    | -1.95281 | -4.27469 | 2.11E-05 | 0.000460125 |
| IGLL5    | -1.40946 | 5.893142 | 2.13E-05 | 0.000463154 |
| PROKR1   | -1.04666 | -3.91095 | 2.32E-05 | 0.000498184 |
| SERPIND1 | -1.12674 | -1.00923 | 2.64E-05 | 0.000555116 |

|           |          |          |             |             |
|-----------|----------|----------|-------------|-------------|
| SERPINA9  | -1.7924  | -1.69197 | 3.30E-05    | 0.00066018  |
| VIL1      | -1.022   | -3.39649 | 3.72E-05    | 0.000726504 |
| FGFBP1    | -1.06326 | 3.121615 | 3.93E-05    | 0.00075581  |
| SPRR2D    | 1.307323 | -2.74432 | 4.17E-05    | 0.000787344 |
| KLK15     | 1.165313 | -0.61413 | 4.21E-05    | 0.000792062 |
| SPRR3     | 1.280391 | -2.96367 | 4.30E-05    | 0.00080629  |
| WFDC8     | -1.09792 | -2.92294 | 4.49E-05    | 0.000837263 |
| SBSN      | -1.19616 | 0.620491 | 4.58E-05    | 0.00084839  |
| MSLN      | -1.02356 | 1.700592 | 4.93E-05    | 0.000899718 |
| GPR15     | 1.000219 | -3.34216 | 5.52E-05    | 0.000988919 |
| MYMK      | -1.03877 | -3.72493 | 5.57E-05    | 0.000996393 |
| SKOR2     | -1.8109  | -1.71782 | 5.58E-05    | 0.000997407 |
| KCNJ3     | -1.29598 | -1.19376 | 5.84E-05    | 0.001033413 |
| APOA1     | -1.08408 | 2.228829 | 5.91E-05    | 0.0010429   |
| LGALS14   | -1.20625 | -4.36193 | 6.04E-05    | 0.001062295 |
| COL6A5    | 1.383971 | 0.770182 | 6.07E-05    | 0.001066166 |
| BRS3      | -1.51507 | -3.61631 | 6.40E-05    | 0.00111217  |
| PTH       | -2.8531  | -2.22005 | 6.87E-05    | 0.001174829 |
| PLD5      | -1.01311 | -1.96505 | 6.89E-05    | 0.001175874 |
| NEUROG2   | 1.245874 | -2.50549 | 6.99E-05    | 0.001189676 |
| NTRK1     | 1.151062 | 0.510774 | 7.59E-05    | 0.001270438 |
| MYOG      | 1.279982 | -4.12657 | 7.73E-05    | 0.00128904  |
| SLC14A2   | -1.10329 | 2.477558 | 7.84E-05    | 0.001299993 |
| TMEM213   | -1.53881 | -1.8784  | 8.01E-05    | 0.001319218 |
| SALL3     | -1.35066 | -1.40184 | 8.08E-05    | 0.001327574 |
| HP        | 1.094275 | 2.392228 | 8.08E-05    | 0.001327574 |
| SLC18A3   | 1.257073 | 0.780866 | 8.36E-05    | 0.001356461 |
| WNT3A     | -1.02408 | -2.27225 | 8.41E-05    | 0.001361594 |
| SPOCK3    | -1.12325 | -0.20108 | 9.14E-05    | 0.001453714 |
| PSG8      | 1.22727  | 1.801672 | 9.28E-05    | 0.001471232 |
| RTP5      | -1.02447 | -3.20295 | 9.72E-05    | 0.001520986 |
| IGLL1     | -1.04112 | -2.34772 | 9.78E-05    | 0.00152682  |
| APELA     | 1.23213  | -1.99366 | 0.000106975 | 0.001639076 |
| KRT17     | -1.07193 | 5.293989 | 0.000110285 | 0.001679531 |
| GP2       | -1.92433 | -3.68379 | 0.000129291 | 0.001891855 |
| SRARP     | -1.06626 | -1.90584 | 0.000135466 | 0.001957429 |
| MYOC      | -1.15649 | 0.70954  | 0.000143196 | 0.002042556 |
| GIP       | -1.43558 | -4.08198 | 0.000146115 | 0.002073965 |
| TCL1A     | -1.27354 | 0.228913 | 0.000157834 | 0.002204786 |
| ASB5      | 1.366261 | -3.10246 | 0.00016169  | 0.002246134 |
| PPP2R2C   | -1.11008 | 0.655994 | 0.000168247 | 0.002309815 |
| TFF1      | -1.1747  | -2.60476 | 0.000185707 | 0.002506409 |
| MYH6      | 1.154665 | -2.38191 | 0.000187879 | 0.002533769 |
| RGS13     | -1.03899 | -1.25449 | 0.000194593 | 0.002612277 |
| CTXN3     | 1.080269 | -4.25917 | 0.000197532 | 0.002641635 |
| TERB2     | -1.15193 | -4.05392 | 0.000198145 | 0.002647809 |
| CHRN3     | -1.51403 | -4.45019 | 0.000261621 | 0.003321622 |
| KRT84     | -1.08235 | -4.35379 | 0.000292915 | 0.003630129 |
| FCAMR     | -1.2334  | -1.02124 | 0.000346153 | 0.004115165 |
| SMR3B     | -1.66676 | 1.101343 | 0.000358495 | 0.004238929 |
| GPRC6A    | 1.072812 | -4.30188 | 0.00036094  | 0.004262099 |
| SLC5A1    | -1.02172 | -0.61595 | 0.000376153 | 0.00440325  |
| IRX6      | -1.14183 | 1.309712 | 0.000392202 | 0.004542711 |
| GCGR      | 1.097289 | 0.806319 | 0.000409844 | 0.004712807 |
| LDLRAD1   | -1.0392  | -3.71709 | 0.000441179 | 0.004984984 |
| CR2       | -1.00803 | 2.737921 | 0.000470749 | 0.005241525 |
| XIRP2     | 1.690217 | -0.09596 | 0.000472344 | 0.005255949 |
| C14orf18C | 1.021767 | -2.87484 | 0.000492891 | 0.00542953  |

|         |          |          |             |             |
|---------|----------|----------|-------------|-------------|
| R3HDML  | -1.1227  | -3.70641 | 0.000497501 | 0.005466591 |
| PAX7    | 1.474889 | -3.25507 | 0.000507077 | 0.00554061  |
| NLRP4   | -1.02061 | -3.32697 | 0.000540698 | 0.005816916 |
| AICDA   | -1.15004 | -2.25029 | 0.000579364 | 0.006120974 |
| SMYD1   | 1.583749 | -3.05381 | 0.000590503 | 0.006205053 |
| CD8B2   | -1.14267 | -2.7317  | 0.000607901 | 0.006338564 |
| VGLL2   | 1.429057 | -4.3826  | 0.000615975 | 0.006403736 |
| TBR1    | 1.015921 | -3.90244 | 0.00065401  | 0.006688271 |
| NWD2    | 1.244895 | -0.48911 | 0.000711085 | 0.00715117  |
| PNLDC1  | -1.01165 | -1.11528 | 0.000721442 | 0.007230482 |
| CALML3  | -1.28747 | -0.97068 | 0.00079501  | 0.007855704 |
| MZB1    | -1.01251 | 4.286035 | 0.000855284 | 0.008297203 |
| CHGA    | -1.38994 | -1.43628 | 0.000882631 | 0.008506099 |
| FGG     | -1.61518 | -2.90841 | 0.001039289 | 0.00955439  |
| OBP2B   | 1.03037  | -0.44237 | 0.001108136 | 0.010014289 |
| SORCS3  | 1.017653 | -4.03005 | 0.001130784 | 0.010135496 |
| SP8     | -1.29614 | -3.47673 | 0.00118599  | 0.010485803 |
| KLHL40  | -1.06923 | -3.13231 | 0.001393077 | 0.011891609 |
| FCRL4   | -1.04912 | -3.06939 | 0.001441513 | 0.01223994  |
| CBY2    | -1.00192 | -3.22371 | 0.001487997 | 0.012567458 |
| FGB     | -1.71077 | -2.61904 | 0.001505656 | 0.012692178 |
| CHAT    | 1.05499  | -2.40146 | 0.001597744 | 0.013260611 |
| HOXC10  | -1.15624 | -1.53107 | 0.00183385  | 0.014565289 |
| FGA     | -1.977   | -2.21907 | 0.001886844 | 0.01487701  |
| SCGB3A2 | -1.07102 | -1.71658 | 0.002589461 | 0.018921494 |
| MTRNR2L | -1.11003 | 4.232446 | 0.002784739 | 0.020015238 |
| SST     | 1.063154 | -0.64483 | 0.003590828 | 0.024391235 |
| AGXT    | -1.04125 | -3.85258 | 0.004472171 | 0.028482717 |
| CARTPT  | 1.106871 | 4.031383 | 0.005238059 | 0.031869394 |
| KRT6A   | -1.01989 | 3.195192 | 0.005400123 | 0.032562076 |
| ZFP42   | -1.05885 | -3.14412 | 0.006941774 | 0.039029972 |
| APOH    | -1.17028 | -3.20518 | 0.007362097 | 0.040689662 |
| ALPI    | 1.112214 | -4.20212 | 0.008165935 | 0.043902527 |
| TTR     | -1.15362 | -1.38436 | 0.008406334 | 0.044878936 |
