# Supplementary material for: Construction and Evaluation of a Tumor Mutation Burden-Related Prognostic Signature for Thyroid Carcinoma
Source: Hindawi journal article supplement (doi:10.1155/2021/1435827), 2021-10-14
Supplement: f2 [file 1435827.f2.pdf]

| gene     | HR       | HR.95L   | HR.95H   | pvalue   |
|----------|----------|----------|----------|----------|
| COL10A1  | 1.018946 | 1.005684 | 1.032383 | 0.004986 |
| BMP8A    | 1.006256 | 1.000252 | 1.012296 | 0.04111  |
| MFAP5    | 1.030532 | 1.004945 | 1.05677  | 0.019054 |
| PODNL1   | 1.051077 | 1.016218 | 1.087132 | 0.003793 |
| WNT3A    | 1.126717 | 1.037947 | 1.22308  | 0.004379 |
| F5       | 1.01179  | 1.004456 | 1.019178 | 0.00159  |
| EPPIN    | 1.367848 | 1.050299 | 1.781404 | 0.020121 |
| SERPIND1 | 1.082392 | 1.027453 | 1.140269 | 0.002892 |
| C6orf118 | 6.806156 | 1.6444   | 28.17061 | 0.008139 |
| ADARB2   | 1.320935 | 1.085581 | 1.607315 | 0.005433 |
| AGRP     | 1.176733 | 1.088437 | 1.272192 | 4.33E-05 |
| MCEMP1   | 1.034247 | 1.01826  | 1.050485 | 2.27E-05 |
| SALL3    | 1.062311 | 1.023206 | 1.102911 | 0.001584 |
| RETN     | 1.041271 | 1.017293 | 1.065815 | 0.000668 |
| SRARP    | 1.79581  | 1.306105 | 2.469122 | 0.000314 |
| EPYC     | 1.035503 | 1.004762 | 1.067185 | 0.023274 |
| CAPN8    | 1.105613 | 1.046574 | 1.167983 | 0.000336 |
| PTGDS    | 1.000962 | 1.000311 | 1.001614 | 0.003779 |
| WT1      | 2.196292 | 1.078232 | 4.473713 | 0.030199 |
| DRC1     | 1.995731 | 1.070498 | 3.720647 | 0.029681 |
| TMPRSS11 | 1.023281 | 1.004385 | 1.042532 | 0.015515 |
| PROKR1   | 1.769875 | 1.259488 | 2.487086 | 0.001005 |
| HMGCS2   | 1.013357 | 1.001845 | 1.025    | 0.022833 |
| TFF3     | 1.000765 | 1.000291 | 1.001239 | 0.001571 |
| PPBP     | 1.027873 | 1.015098 | 1.04081  | 1.65E-05 |
| CXCL5    | 1.170985 | 1.097672 | 1.249195 | 1.71E-06 |
| STAB2    | 2.758467 | 1.124647 | 6.765803 | 0.026652 |
| ARMC3    | 1.693429 | 1.189631 | 2.410581 | 0.003458 |
| MYH6     | 2.207772 | 1.077167 | 4.525073 | 0.030543 |
| TFF1     | 1.214818 | 1.106725 | 1.333468 | 4.26E-05 |
| SCN1A    | 42.24761 | 1.236509 | 1443.468 | 0.037728 |
| FUT9     | 1.320715 | 1.063756 | 1.639746 | 0.011741 |
| OLFM4    | 1.033106 | 1.00991  | 1.056834 | 0.004938 |
